# Supplementary material for: Growth-dependent signals drive an increase in early G1 cyclin concentration to link cell cycle entry with cell growth
Source: eLife journal article supplement (doi:10.7554/elife.64364), 2021-10-29
Supplement: fig7-data6 [file elife-64364-fig7-data6-v3.pdf]

\_\_\_\_\_
